# Supplementary material for: Age, thinning and spatial origin of the Beyond EPICA ice from a 2.5D ice flow model
Source: Copernicus journal article supplement (doi:10.5194/egusphere-2024-1650), 2024-06-14
Supplement: Supplementary file 1 [file egusphere-2024-1650-supplement.pdf]

## Supplementary material

### 485 Forward model grid

We use a coordinate system with nodes along the ice flux lines, based on the work of Parrenin and Hindmarsh (2007). It has the advantage that particle trajectories follow the nodes of the grid and therefore are trivial to calculate, reducing computation time. However, this means that the forward model requires an irregular grid which changes with each new set of parameters tested during the optimisation. The inverse model (where inferred parameters  $\bar{a}$ ,  $p$  and  $H_m$  are defined) and observation (radar isochrones for comparison) grids are regular in the  $(x, \text{Depth})$  coordinate system, though with a different number of nodes. 490 The interpolation between the forward and inverse model grids thus introduces uncertainties, especially further from the dome, where the forward model grid is coarse. We reduced uncertainty by increasing the resolution of the forward model, so the grid is fine even near the end of the flow line, where the BELDC drill site is located.

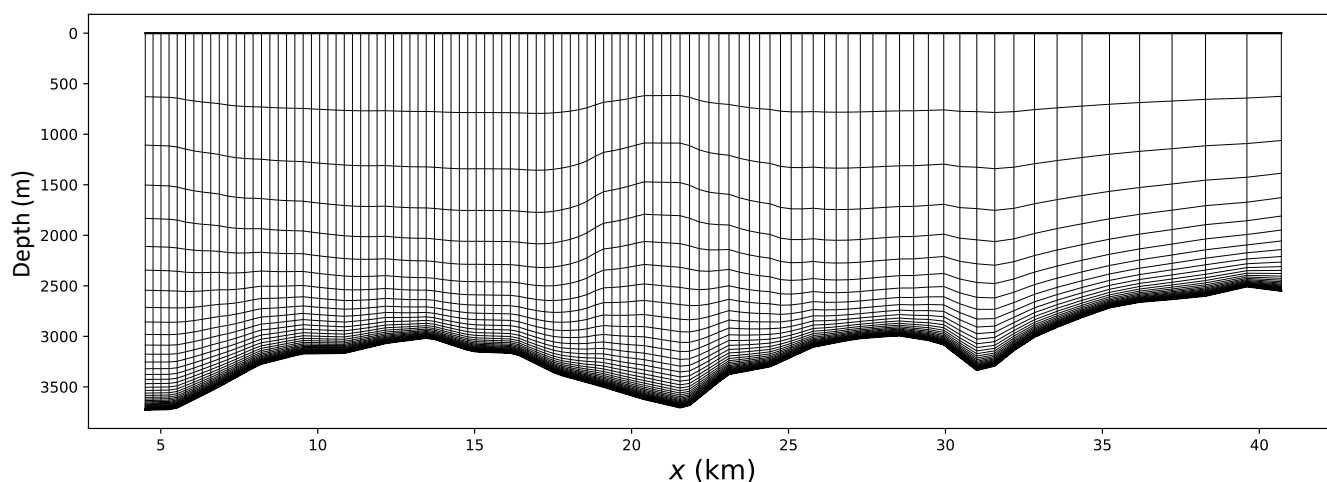

**Figure S1.** Grid used in the forward model which is regular in the forward model coordinate system, but is shown here in the physical coordinate system  $(x, \text{Depth})$ . This figure is for illustrative purposes only, the grid used in the final forward model has 600 nodes in the  $x$  direction, more than are shown here.

## GNSS surface velocities

| Station | Latitude (°S) | Longitude (°E) | Horizontal velocity $v$ (mm yr <sup>-1</sup> ) | $\sigma_v$ (mm yr <sup>-1</sup> ) | Azimuth (°) |
|---------|---------------|----------------|------------------------------------------------|-----------------------------------|-------------|
| GPS1    | 75.34232      | 122.27677      | 71.7                                           | ±0.8                              | 241         |
| GPS2    | 75.30740      | 122.16995      | 97.5                                           | ±1.6                              | 264         |
| GPS3    | 75.27960      | 122.31078      | 83.5                                           | ±0.3                              | 266         |
| GPS4    | 75.31447      | 122.41796      | 63.0                                           | ±1.0                              | 228         |
| LCAT    | 75.28898      | 122.54462      | 49.6                                           | ±0.7                              | 223         |
| LDC3    | 75.33861      | 122.51726      | 72.0                                           | ±0.8                              | 200         |
| LDC4    | 75.37072      | 122.47751      | 88.7                                           | ±0.6                              | 196         |
| LDC5    | 75.39368      | 122.36740      | 101.8                                          | ±2.1                              | 196         |
| LDC6    | 75.35578      | 122.21080      | 83.0                                           | ±0.8                              | 233         |
| LDC7    | 75.31261      | 122.11644      | 98.3                                           | ±0.8                              | 264         |
| LDC8    | 75.28692      | 122.43745      | 53.9                                           | ±0.6                              | 247         |
| LDC9    | 75.27775      | 122.19370      | 108.4                                          | ±0.7                              | 270         |
| LDCC    | 75.31098      | 122.29347      | 78.0                                           | ±0.3                              | 251         |
| NECK    | 75.26738      | 122.73825      | 37.6                                           | ±0.6                              | 206         |

**Table S1.** GNSS control points positions and velocities (International Terrestrial Reference Frame 2014). Azimuth is relative to true north.

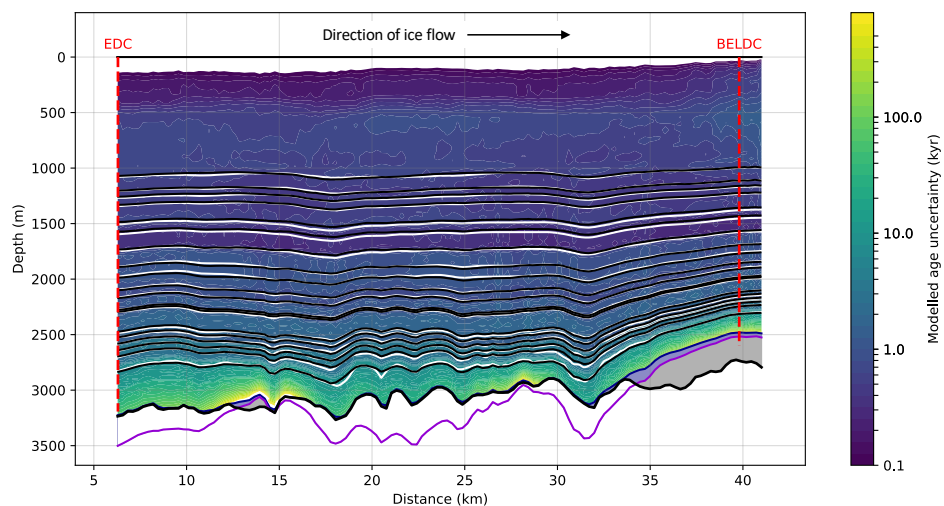

**Figure S2.** Age uncertainty from the 2.5D model for the DC–LDC flow line. White lines show observed isochrones mapped from the radar transect onto the flow line and black lines show modelled isochrones. The thick black line shows bedrock depth observed in the radar transect, the thick purple line is mechanical ice thickness  $H_m$ . Grey areas are modelled stagnant ice. The locations of the EDC and BELDC ice core drill sites are marked by red dashed lines. The present day direction of horizontal ice flow is left to right, from DC to LDC.

## Age misfit

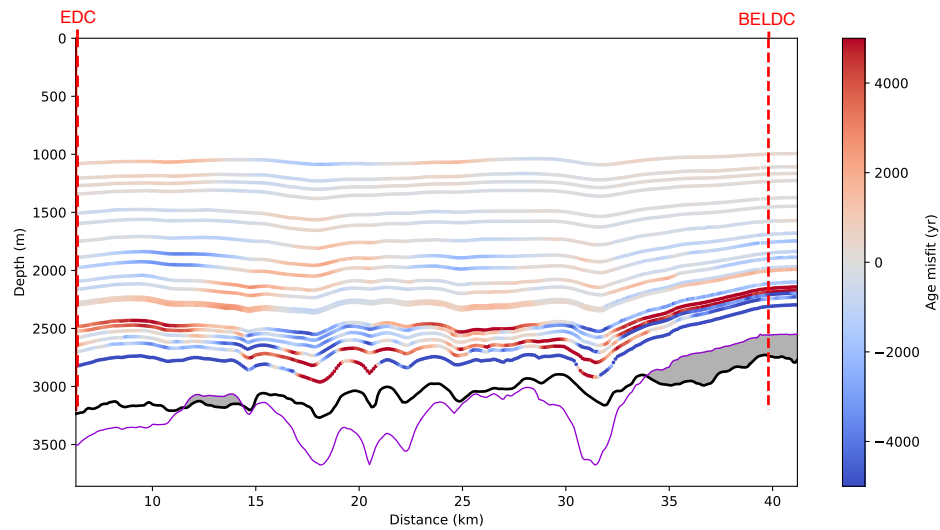

**Figure S3.** Age misfit for the 1D model from Chung et al. (2023a) applied to the DC–LDC flow line in this study. Age misfit corresponds to the age of modelled isochrones minus the age of observed isochrones. The thick black line shows bedrock depth observed in the radar transect, the thick purple line is mechanical ice thickness  $H_m$ . Grey areas are modelled stagnant ice. The locations of the EDC and BELDC ice core drill sites are marked by red dashed lines.
