# Supplementary material for: Age, thinning and spatial origin of the Beyond EPICA ice from a 2.5D ice flow model
Source: Copernicus journal article supplement (doi:10.5194/egusphere-2024-1650), 2024-06-14
Supplement: Supplementary file [file egusphere-2024-1650-AC1-supplement.pdf]

---

# Response to review 1

Reviewer comments

Author replies

*New text in manuscript*

We thank the reviewer for their comments and address their concerns with the lack of description of the forward model here.

A companion article detailing the full analytical method used in the forward model is now available in preprint [Parrenin et al. \(2025\)](#). We hope that it provides the technical details that the reviewer requested here.

We would like to highlight that this article is intended as an application of an existing model at Dome C and a discussion of its effects on the Beyond EPICA drill site. We felt that including both the analytical model development and fully discussing the application would be too heavy for a single paper, and these 2 aspects are relevant for different audiences. Therefore, in this article we focus on the application at Dome C.

This study presents a so-called 2.5D inverse model for simulating the age–depth relationships along a flow line from Dome C to Little Dome C in Antarctica. This is an important topic in glaciology, e.g., finding a location of an old ice core, which matches the scope of The Cryosphere. However, I find it is very difficult for me to understand this manuscript, and at some places I feel not much sense to me.

The analytical development is heavily based on the work of Parrenin and Hindmarsh (2007). The idea to infer a mechanical ice thickness is based on Chung et al. 2023 as mentioned in section 2.1.

The main reason is that the authors do not even put some basic explanations of their model. I do not understand why “a full description of the forward model will be available in a separate subsequent article” is possible if they do not make it clear in this paper? For example, Eqn 1 gives the vertical velocity profile, but what does the horizontal ice velocity (flux) look like? Both horizontal and vertical ice velocity are critical in determining the shapes of age-depth profiles.

We apologise for the cryptic statement here. At the time we submitted this paper, we were still writing the full description of the model. However, we found that The Cryosphere does not allow an article to be referenced as “in prep”, hence the statement. We have now referenced the preprint, Parrenin et al. (2025), throughout.

The horizontal flux is shown in Eq. 1 of Parrenin et al. (2025) and is the integral of the flow tube width, snow/ice density and horizontal velocity. Horizontal velocity depends on the normalised stream function (first defined by Parrenin and Hindmarsh, 2007). For the forward model, in this study, melting flux is zero, therefore the horizontal velocity simplifies to take the form of the derivative of  $\omega$ .

The authors also do not explain basically the inverse model, e.g., what is  $p_{\text{prior}}$  and why they need to use a term “mechanical ice thickness” since they have already the observed ice thickness data - this does not make much sense not using the observed data!

---

The inverse model is very much related to the method applied in Chung et al. 2023. Indeed, this is where there is a full description of "mechanical ice thickness" and how its comparison to observed ice thickness leads to the inferences of the basal condition of the ice. The use of measured rather than inferred/mechanical ice thickness would preclude the existence of a basal layer.

However, given the reviewers comments, we have now re-described these aspects of the model as this is a relatively new method which the reader may not be familiar with.

Text modified in Sec 2.2:

*The inverse model performs an optimisation to infer three parameters at each horizontal position,  $x$ : steady accumulation,  $\bar{a}$  (as defined in Sect. 2.1); Lliboutry thinning parameter,  $p$  (Eq. 1); and mechanical ice thickness,  $H_m$ . The mechanical ice thickness ( $H_m$ , first defined in Chung et al. (2023b)) is the best fit ice sheet thickness when considering the shape of the isochrones given no basal melt rate (Fig 1. from Chung et al. 2023). The difference between the mechanical ice thickness,  $H_m$  and the observed ice thickness  $H_{obs}$  is used to determine either a basal melt rate  $m$  or the thickness of a stagnant ice layer, as in Chung et al. (2023b). Where  $H_m < H_{obs}$ , there is a stagnant ice layer of thickness  $H_{obs} - H_m$ . The label "stagnant" is used as the vertical velocity profile is assumed to be zero at depths greater than  $H_m$ . Where  $H_m > H_{obs}$ , there is basal melting  $m$  which is calculated using the value of the ice flux  $\Delta q$  over the horizontal distance interval  $\Delta x$  at depth  $H_{obs}$ ,*

*(Eq. 2),*

*where  $Y$  is the flow tube width.*

Actually, the age-depth modeling is not new. If the authors can dig a bit in past literatures, they can easily find some nice and important papers, like Greve et al. (2002) and Rybak and Huybrechts (2003). Based on ice flow models and the Eulerian or Lagrangian methods, we can determine the age-depth relationships in a more physical way. I do not see the authors even mention these previous work in the Introduction section.

As mentioned above, this article is intended as an application of the model near Dome C, therefore the introduction is more focused on what has been done previously at this location, not on age modelling in general. A more modelling oriented introduction can be found in the Parrenin et al. (2025) preprint, including reference to Rybak and Huybrechts (2003).

Sentence now added to introduction:

*There are many types of numerical schemes which can be used to model ice flow and the age-depth relationship in an ice sheet (Greve et al., 2002, Rybak and Huybrechts, 2003).*

I am not sure what the "forward model" is about if they do not use a physical ice flow model. If I am not convinced the velocity field is correct, it is also hard for me to believe the inversed age-depth profiles are correct either. The inverse model is then just an optimization approach to find the numbers that match the radar chronology record, but without much physics inside.

The forward model refers to the model presented in Parrenin et al. (2025) which uses the coordinate system from Parrenin and Hindmarsh 2007. Both of these papers give a full account of

---

the physical ice flow model, therefore we do not go into so much detail in the article. In this study, we highlight only the adaptations to these previous works in order to make the inverse model.

We modify the introductory paragraph in Sec 2.1 - Forward model (LINE 77 ) to make this clearer: *The forward model is based on the analytical development of (Parrenin and Hindmarsh, 2007), with a numerical model presented in our companion paper Parrenin et al. (2025). As the numerical scheme is fully described in these articles, here we outline the benefits of this method and the slight changes required to make this suitable for an inverse model.*

We follow this with a more detailed description of the mechanics of the model without going into the mathematical detail already provided by Parrenin et al. (2025) and Parrenin and Hindmarsh, 2007:

*We use a pseudo-steady model which includes a steady-state geometry and velocity profile. The model determines the path of particles through the ice sheet by considering the total ice flux  $q$  through a flow tube with width  $Y$  as in Parrenin et al. (2025). In this study, the flow tube width is variable along the flow line in the  $x$  direction but constant in the vertical direction  $z$ .*

*We use the equation for ice particle trajectories presented in Parrenin and Hindmarsh (2007) and build a grid that follows these trajectories. This method has the advantage that ice particle trajectories pass exactly through grid nodes so no interpolation is required in the forward model. Given the increasing horizontal flow speed along the flow line, this means that the grid along the  $x$  axis is finer near the dome and coarser further downstream. In the  $z$  direction, the grid is coarse near the surface and becomes finer towards the bed where ice layers have thinned considerably (Fig. S1).*

The writings also make me confused often. For example,

L13, “the 2.5D model predicts a basal layer 200–250 m thick at the base of the ice sheet”, what is “basal layer 200-250 thick”?

Reworded to: *the thickness of a modelled basal layer is 200-250 m at the base of the ice sheet. This is a layer of ice above the bedrock which seems to have different flow behaviour to the ice flowing above.*

L68, “There is no direct thermal representation in the forward model as we use an inferred mechanical ice thickness to determine a basal melt rate”, this sentence comes from no where, and has no references and no explanations.

This sentence relates to Parrenin and Hindmarsh (2007) (for the forward model) and Chung et al. 2023 (for mechanical ice thickness) which are referenced in the sentences before and after this one. As this is not clear as a stand alone sentence we have now added more description.

We modify the introductory methods (Sec 2) to:

*We present a 2.5D ice flow model that uses inverse methods, constrained by radar observed isochrones, to fit poorly known parameters. The basic forward ice flow model is based on the analytical development presented in Parrenin and Hindmarsh (2007). Their numerical scheme was then developed into a forward model by Parrenin et al. (2025). This method is particularly efficient, as it performs a coordinate transformation to a system where particle trajectories are linear and therefore straightforward to calculate. The forward model does this by considering the ice flux due to vertical compression and horizontal ice flow. The main change from the numerical scheme presented in Parrenin et al. (2025), is that here, the forward model has no basal melting. The basal state of the ice sheet (including basal melting) is instead accounted for by the inverse model. The inverse model works by finding the best-fit value of physical ice flow parameters in the forward model, which lead to the current state of the ice sheet ie. the shape of the radar isochrones. The inverse approach is similar to that of a 1D ice flow model presented by Chung et al. (2023b). We use three inferred parameters—the steady-state (i.e., time-independent) accumulation rate  $\bar{a}$ , the Lliboutry velocity profile parameter  $p$*

---

and the mechanical ice thickness  $H_m$ . The inferred mechanical ice thickness is used to determine either a basal melt rate or the thickness of a stagnant ice layer as in Chung et al. (2023b).

The observation based constraints required for our 2.5D model are the flow tube width (forward model) and radar isochrones (inverse model). The width of the flow tube was determined using geodetic surface velocity measurements (Sect. 2.3). The inverse model is constrained by isochrones along a radar transect which approximately follows the flow line (Sect. 2.4). The forward model is run for different values of the three inferred parameters, resulting in modelled ages for observed isochrones. The inverse model optimises a cost function by selecting the best-fit parameters, which minimise the age misfit of the isochrones generated by the forward model to the observed isochrones.

L80: what is the form of “horizontal flux shape function”?

The horizontal shape function has the form of Eq. 38 of Parrenin and Hindmarsh (2007) and Eq. 1 of this article.

L97: no definitions for  $p$  and  $H_w$

These are defined in the text at:

Line 70: Lliboutry velocity profile parameter  $p$  and the mechanical ice thickness  $H_m$

Line 85: changing the value of  $p$ , making the vertical velocity profile more or less linear,

Line 96: thinning parameter,  $p$  (Eq. 1); and mechanical ice thickness,  $H_m$

L110: What is  $\Delta q$  and  $\Delta x$ ?

Line 110: ice flux  $\Delta q$

Now added: *the value of the ice flux  $\Delta q$  over the horizontal distance interval  $\Delta x$*

Table 1: what is the spatial locations for these 19 IRHs?

(Added to Table 1 caption):

*The isochrones are traced in the radar transect shown by the red line in Fig. 2*

These kind of major and minor issues make me feel very difficult to read and understand this manuscript. Thus, I suggest the authors take another careful round of modifications and re-submit the manuscript after they add the necessary inputs.

References:

Ralf Greve, Yongqi Wang, and Bernd Mücke. Comparison of numerical schemes for the solution of the advective age equation in ice sheets. *Annals of Glaciology*, 35:487–494, 2002.

Oleg Rybak and Philippe Huybrechts. A comparison of eulerian and lagrangian methods for dating in numerical ice-sheet models. *Annals of Glaciology*, 37:150–158, 2003.

## References

Chung, A., Parrenin, F., Steinhage, D., Mulvaney, R., Martín, C., Cavitte, M. G. P., Lilien, D. A., Helm, V., Taylor, D., Gogineni, P., Ritz, C., Frezzotti, M., O'Neill, C., Miller, H., Dahl-Jensen, D., & Eisen, O. (2023). Stagnant ice and age modelling in the Dome C region, Antarctica. *The Cryosphere*, 17(8), 3461–3483. <https://doi.org/10.5194/tc-17-3461-2023>

---

Parrenin, F., Chung, A., and Martín, C.: age\_flow\_line-1.0: a fast and accurate numerical age model for a pseudo-steady flow tube of an ice sheet, EGUsphere [preprint], <https://doi.org/10.5194/egusphere-2024-3411>, 2025.

Parrenin, F., & Hindmarsh, R. (2007). Influence of a non-uniform velocity field on isochrone geometry along a steady flowline of an ice sheet. *Journal of Glaciology*, 53(183), 612–622. <https://doi.org/10.3189/002214307784409298>
